# Supplementary material for: Effect of Sex Steroids and PGF2α on the Expression of Their Receptors and Decorin in Bovine Caruncular Epithelial Cells in Early–Mid Pregnancy
Source: MDPI journal article supplement (doi:10.3390/molecules27217420), 2022-11-01
Supplement: s1 [file s1]

Table S2. Expression of target genes in caruncular epithelial cells exposed to E2, P4, PGF<sub>2α</sub> or PBS (control) during the 2<sup>nd</sup> and 4<sup>th</sup> month of bovine pregnancy. The presented values stand for ΔCq.

|                   | 2 <sup>nd</sup> month |             |            |              | 4 <sup>th</sup> month |             |            |              |
|-------------------|-----------------------|-------------|------------|--------------|-----------------------|-------------|------------|--------------|
|                   | <i>DCN</i>            | <i>ESR1</i> | <i>PGR</i> | <i>PTGFR</i> | <i>DCN</i>            | <i>ESR1</i> | <i>PGR</i> | <i>PTGFR</i> |
| control           | 13,789                | 1,62        | 3,453      | 13,458       | 14,543                | 1,914       | 5,034      | 13,843       |
| control           | 14,623                | 2,232       | 4,014      | 14,574       | 12,978                | 1,966       | 5,376      | 13,975       |
| control           | 9,825                 | 2,167       | 7,416      | 1,315        | 15,459                | 2,312       | 4,511      | 14,529       |
| control           | 10,642                | 2,187       | 7,494      | 0,584        | 14,321                | 2,433       | 4,123      | 13,419       |
| E2                | 13,934                | 1,704       | 3,226      | 13,863       | 12,847                | 1,831       | 4,609      | 14,592       |
| E2                | 14,507                | 2,047       | 2,736      | 14,482       | 14,508                | 2,262       | 4,898      | 14,644       |
| E2                | 9,536                 | 1,897       | 6,293      | 1,164        | 14,171                | 3,419       | 4,884      | 13,789       |
| E2                | 8,965                 | 1,722       | 7,192      | 1,382        | 13,411                | 1,91        | 2,89       | 14,647       |
| P4                | 15,012                | 1,586       | 3,119      | 13,591       | 15,04                 | 1,866       | 4,247      | 14,641       |
| P4                | 13,07                 | 1,507       | 2,745      | 13,228       | 13,625                | 1,73        | 4,053      | 14,273       |
| P4                | 7,71                  | 2,062       | 6,916      | 1,514        | undetermined          | 5,23        | 5,552      | 13,607       |
| P4                | 8,882                 | 1,827       | 7,296      | 1,243        | undetermined          | 3,992       | 3,965      | 10,563       |
| PGF <sub>2α</sub> | 14,352                | 1,547       | 3,774      | 14,331       | 13,108                | 1,601       | 4,275      | 15,92        |
| PGF <sub>2α</sub> | 13,094                | 2,179       | 3,386      | 14,225       | 13,981                | 2,403       | 4,828      | 14,297       |
| PGF <sub>2α</sub> | 10,28                 | 1,838       | 7,292      | 0,458        | 14,785                | 2,176       | 4,837      | 15,142       |
| PGF <sub>2α</sub> | 9,903                 | 2,236       | 6,858      | 0,116        | 15,591                | 1,629       | 4,544      | 16,31        |
