# Supplementary material for: Effect of Sex Steroids and PGF2α on the Expression of Their Receptors and Decorin in Bovine Caruncular Epithelial Cells in Early–Mid Pregnancy
Source: MDPI journal article supplement (doi:10.3390/molecules27217420), 2022-11-01
Supplement: s1 [file s1]

Table S1. Parameters derived from RT-qPCR analysis - standard curve slope, regression coefficient ( $R^2$ ), reaction efficiency, melting temperature of the amplicon ( $T_m$ ) and sample  $C_t$  data.

| <b>Target</b> | <b>Slope</b> | <b><math>R^2</math></b> | <b>Efficiency (%)</b> | <b><math>T_m</math></b> | <b><math>C_{tmin}</math></b> | <b><math>C_{tmax}</math></b> | <b><math>C_t</math> range</b> |
|---------------|--------------|-------------------------|-----------------------|-------------------------|------------------------------|------------------------------|-------------------------------|
| <i>DCN</i>    | *NA          | *NA                     | *NA                   | 81°C                    | 29.61                        | 36.77                        | 5.84                          |
| <i>ESRI</i>   | -3.23        | 0.9985                  | 103.87                | 83°C                    | 21.02                        | 29.06                        | 8.04                          |
| <i>PGR</i>    | -3.29        | 0.9936                  | 101.30                | 81°C                    | 22.57                        | 29.98                        | 7.41                          |
| <i>PTGFR</i>  | -3.18        | 0.9938                  | 106.16                | 79°C                    | 19.57                        | 35.50                        | 15.93                         |
| <i>ACTRIA</i> | -3.19        | 0.9975                  | 105.66                | 84°C                    | 19.03                        | 24.87                        | 5.84                          |
| <i>HDAC1</i>  | -3.29        | 0.9976                  | 101.38                | 80°C                    | 19.32                        | 25.62                        | 6.30                          |

\*NA - not analyzed
