# Supplementary material for: Effect of Sex Steroids and PGF2α on the Expression of Their Receptors and Decorin in Bovine Caruncular Epithelial Cells in Early–Mid Pregnancy
Source: MDPI journal article supplement (doi:10.3390/molecules27217420), 2022-11-01
Supplement: s1 [file s1]

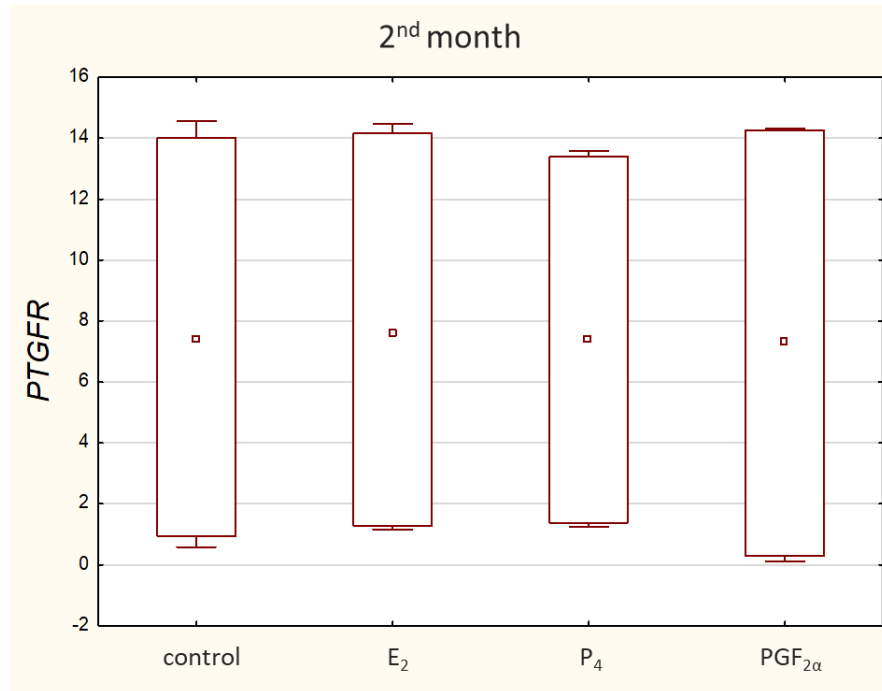

Figure S2. Expression of *PTGFR* in caruncular epithelial cells exposed to E<sub>2</sub>, P<sub>4</sub>, PGF<sub>2 $\alpha$</sub>  or PBS (control) during the 2<sup>nd</sup> month of bovine pregnancy. Presented values stand for  $\Delta Cq$ . The higher the  $\Delta Cq$  the lower the mRNA level of the target gene. Data are shown in the box plots including the minimum and the maximum value (whiskers), the sample median (small square in the middle), and the first and third quartiles (frame).
