# Supplementary material for: Effect of Sex Steroids and PGF2α on the Expression of Their Receptors and Decorin in Bovine Caruncular Epithelial Cells in Early–Mid Pregnancy
Source: MDPI journal article supplement (doi:10.3390/molecules27217420), 2022-11-01
Supplement: s1 [file s1]

Melt Curve Plot (Derivative)

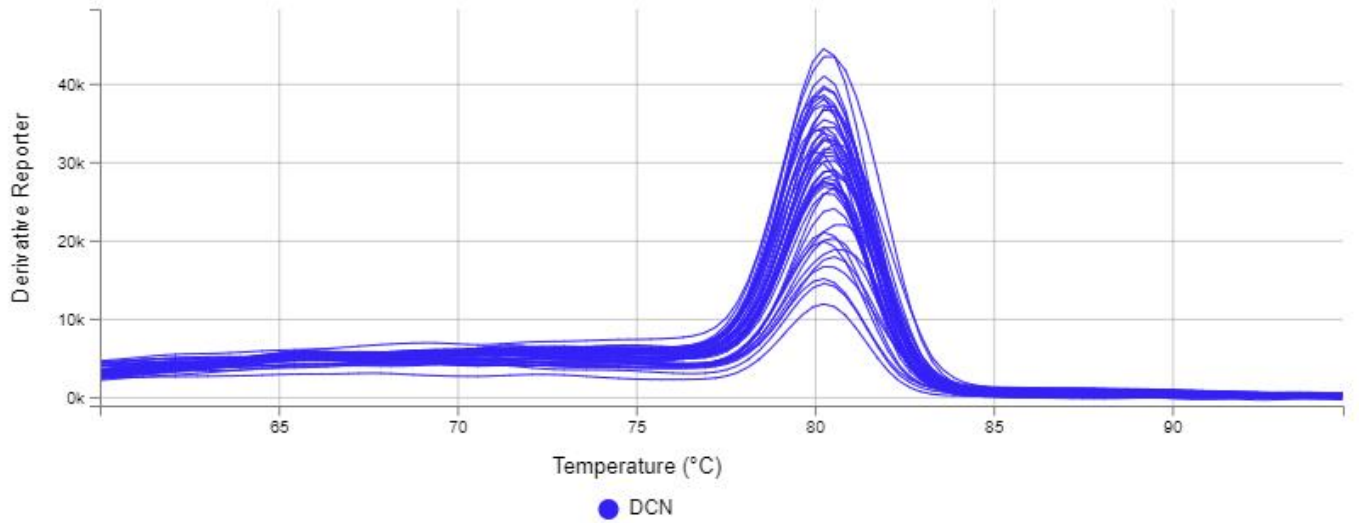

Melt Curve Plot (Derivative)

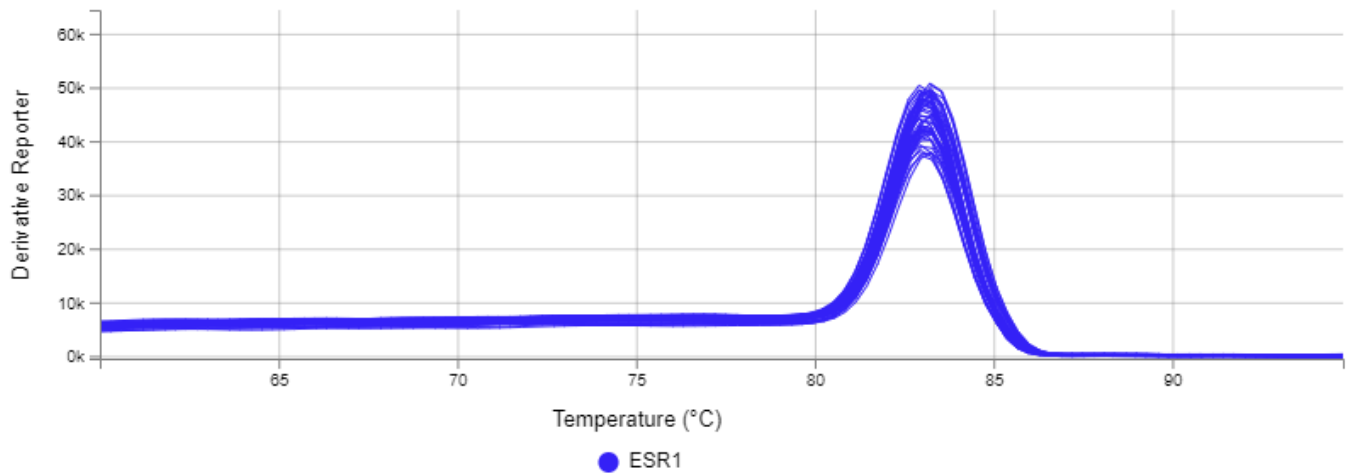

Melt Curve Plot (Derivative)

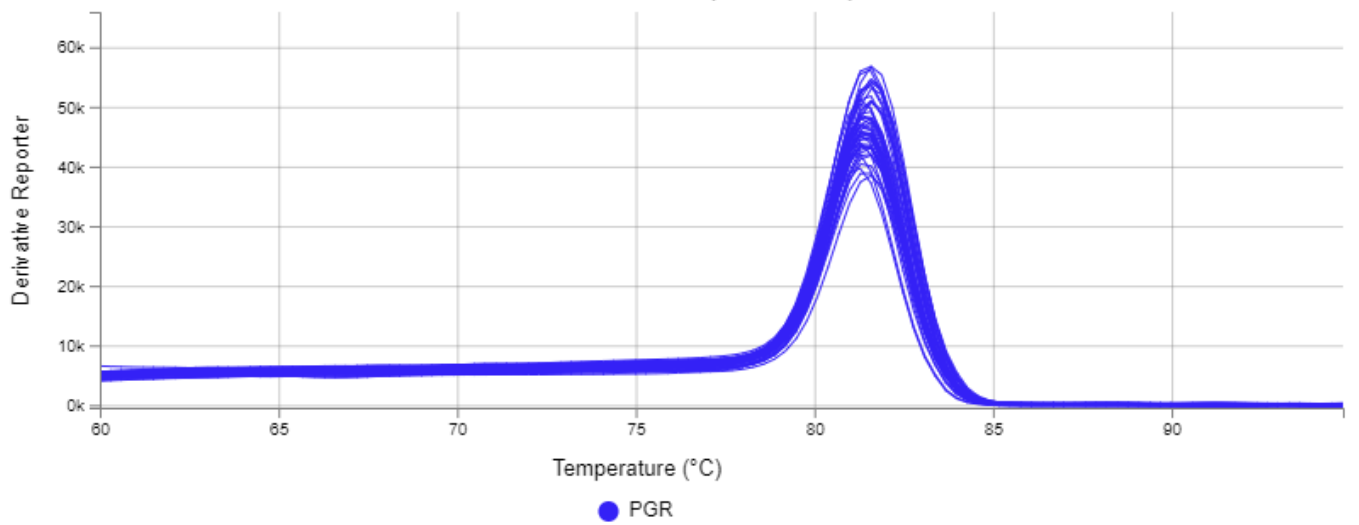

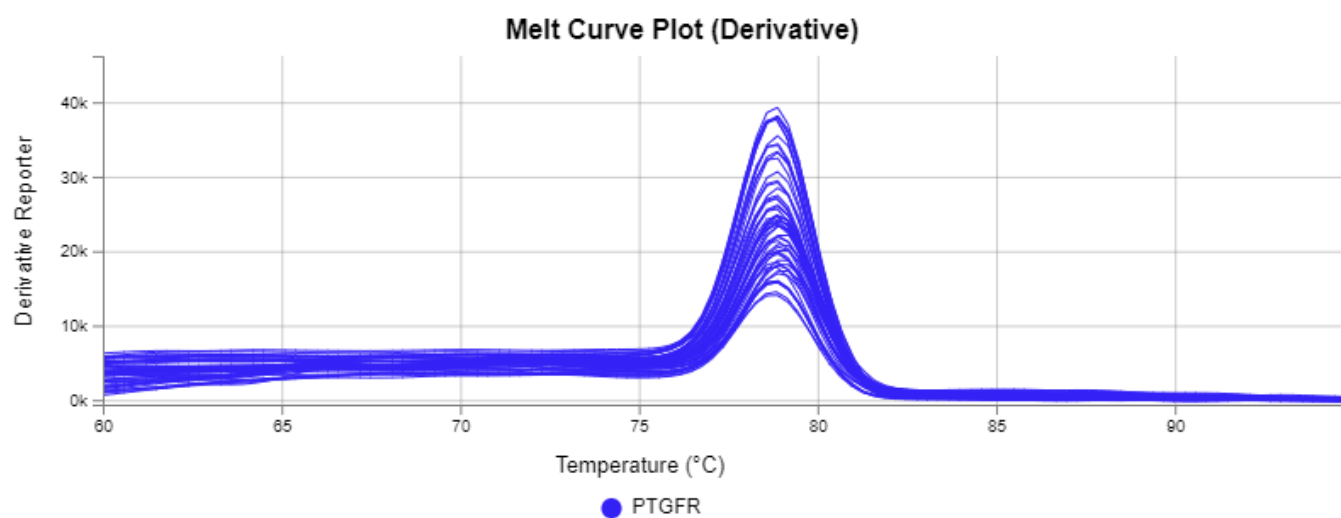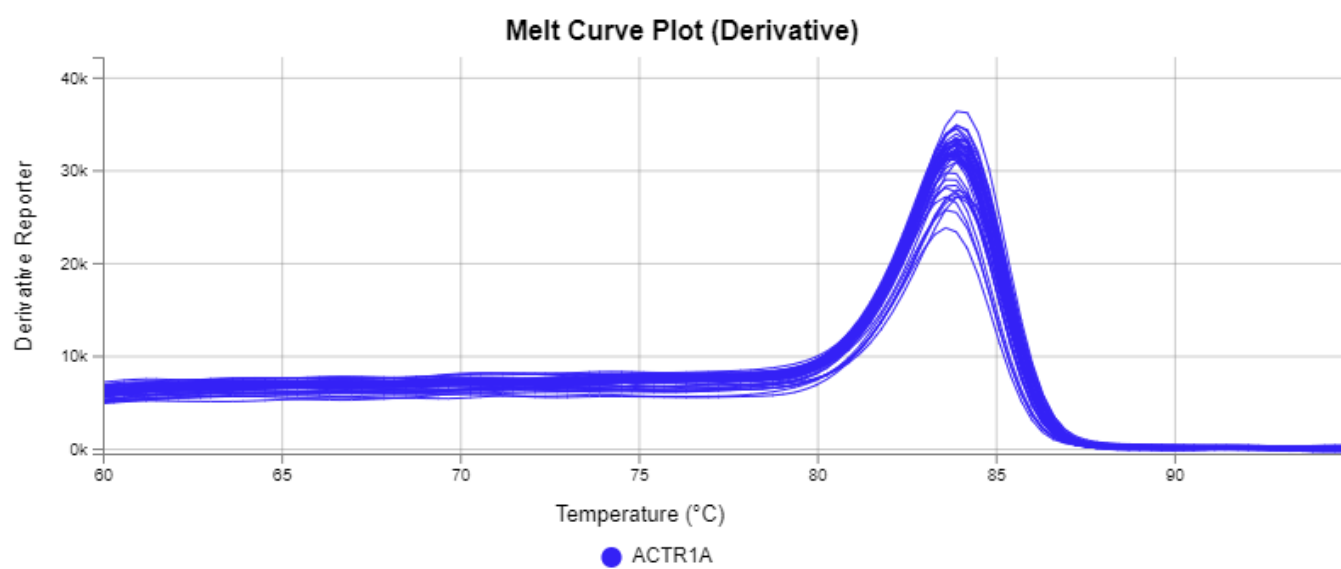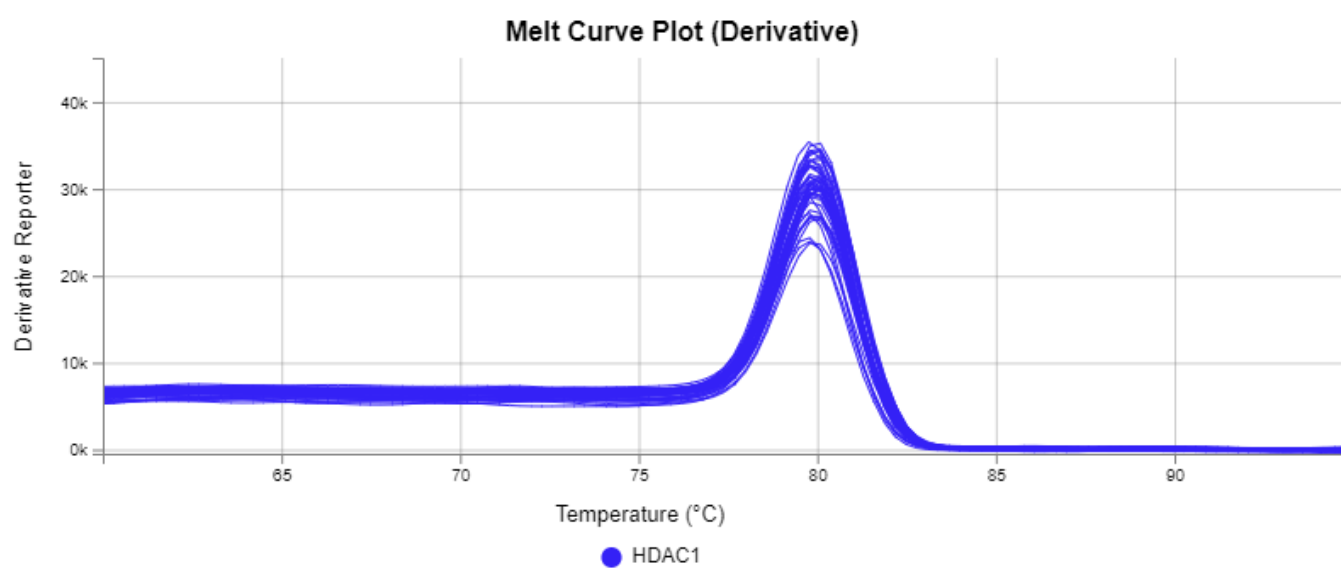

Figure S1. Melting curves obtained for genes of interest and reference genes.
